# Supplementary material for: Transcriptome profiling of subepithelial PDGFRα cells in colonic mucosa reveals several cell-selective markers
Source: PubMed Central journal article supplement (PMC9106222; doi:10.1371/journal.pone.0261743), 2022-05-13

Fig 3c\_Adamdec1

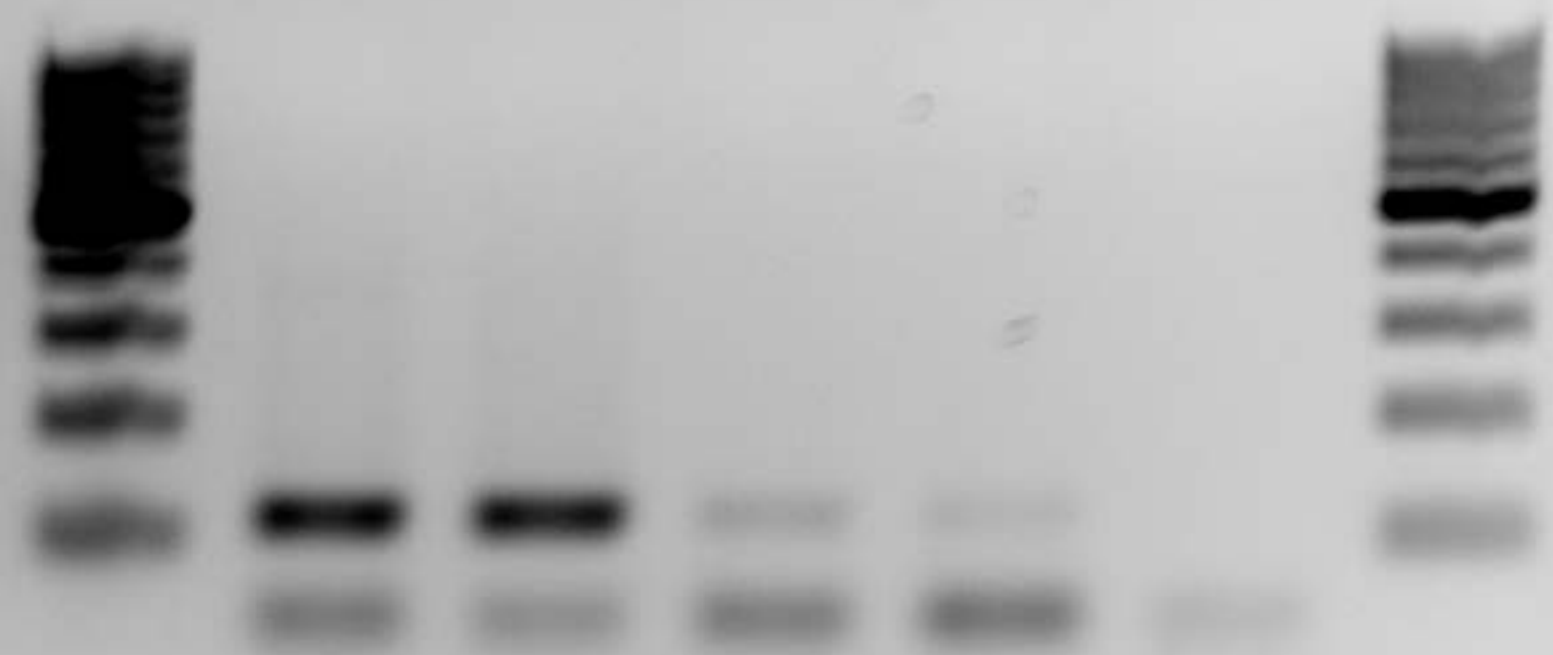

Fig 3c\_Fn1

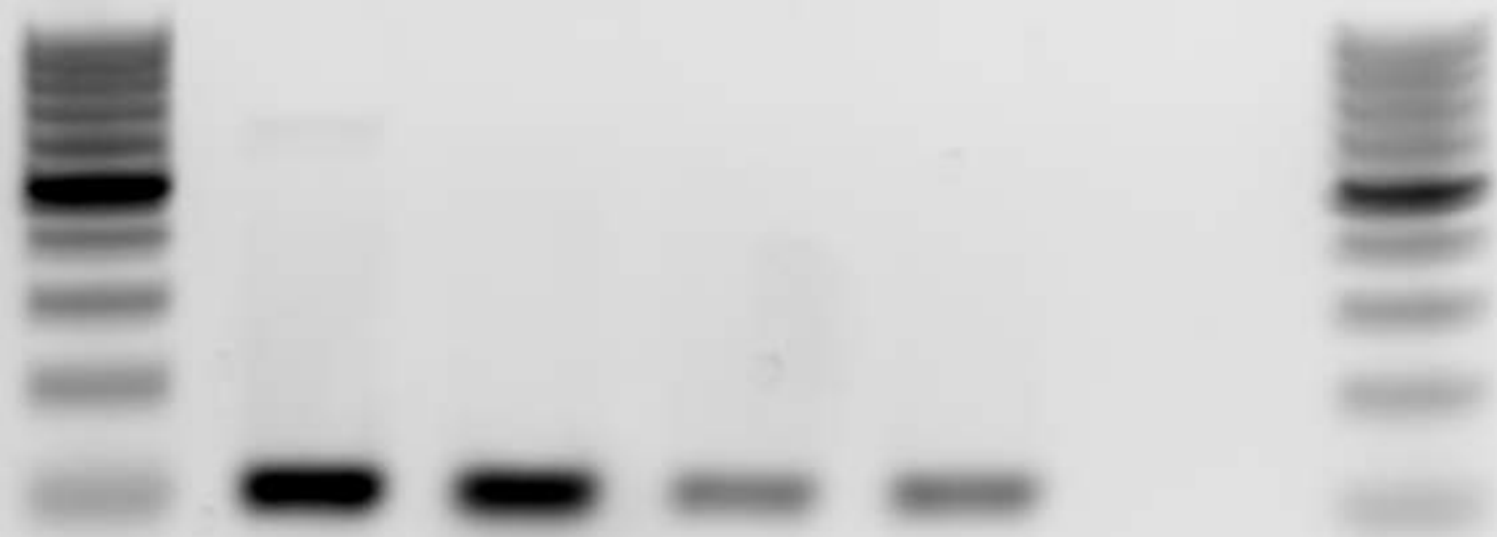

Fig 3c\_Col6a1

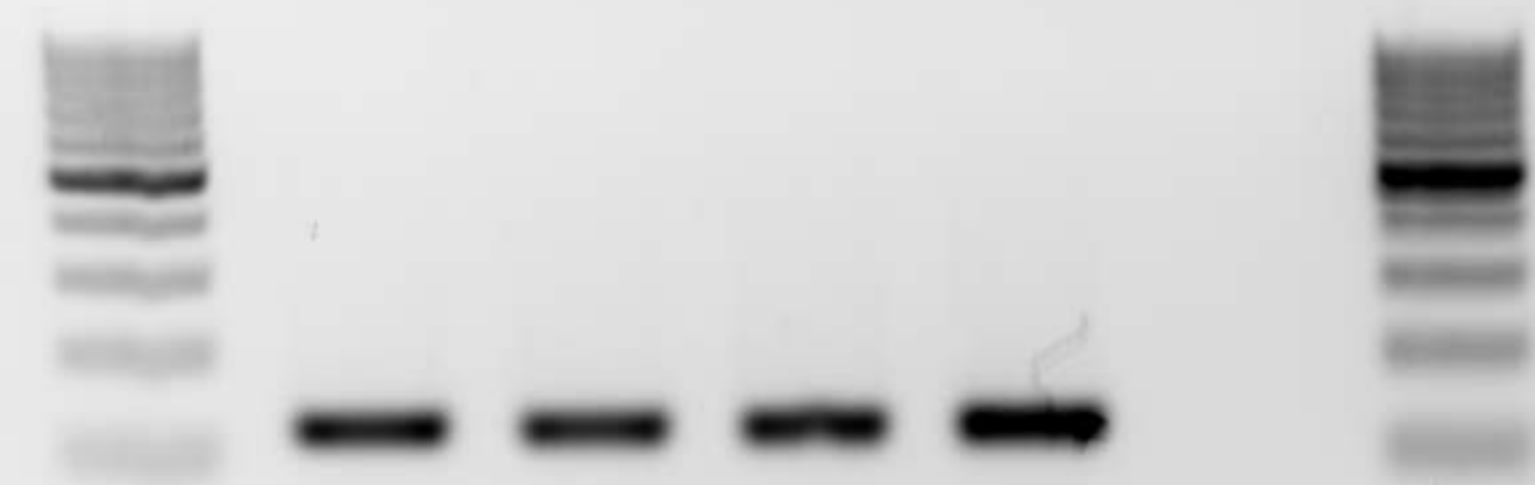

Fig 3c\_Col6a2

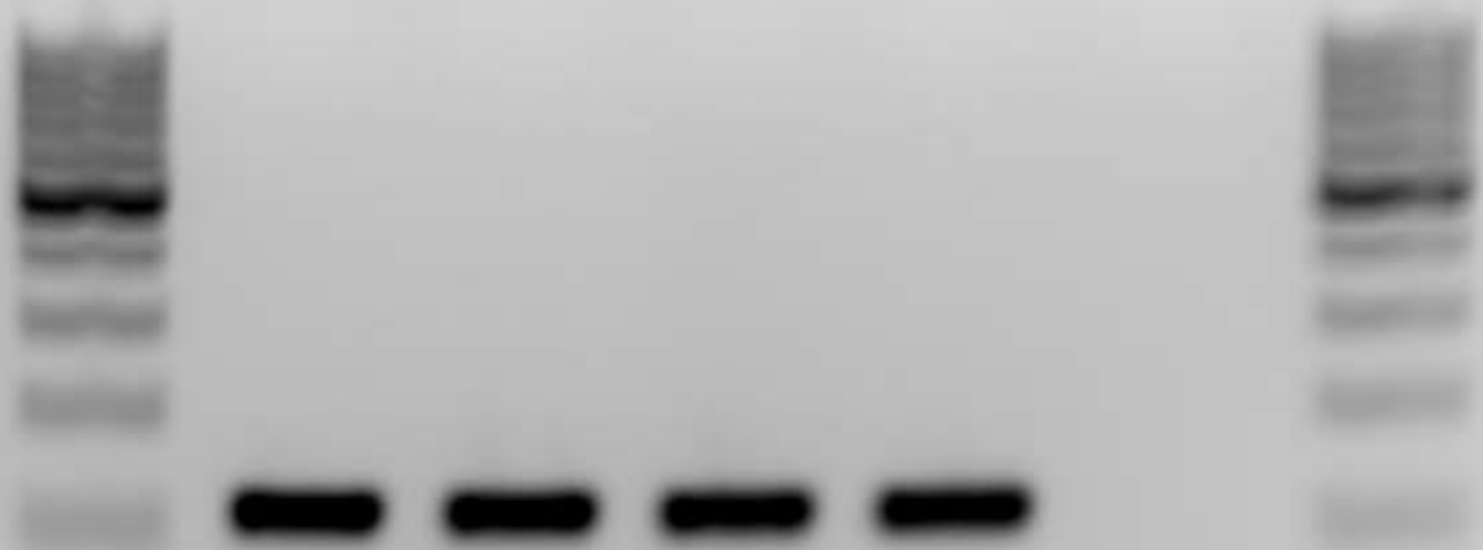

Fig 3c\_Col6a3

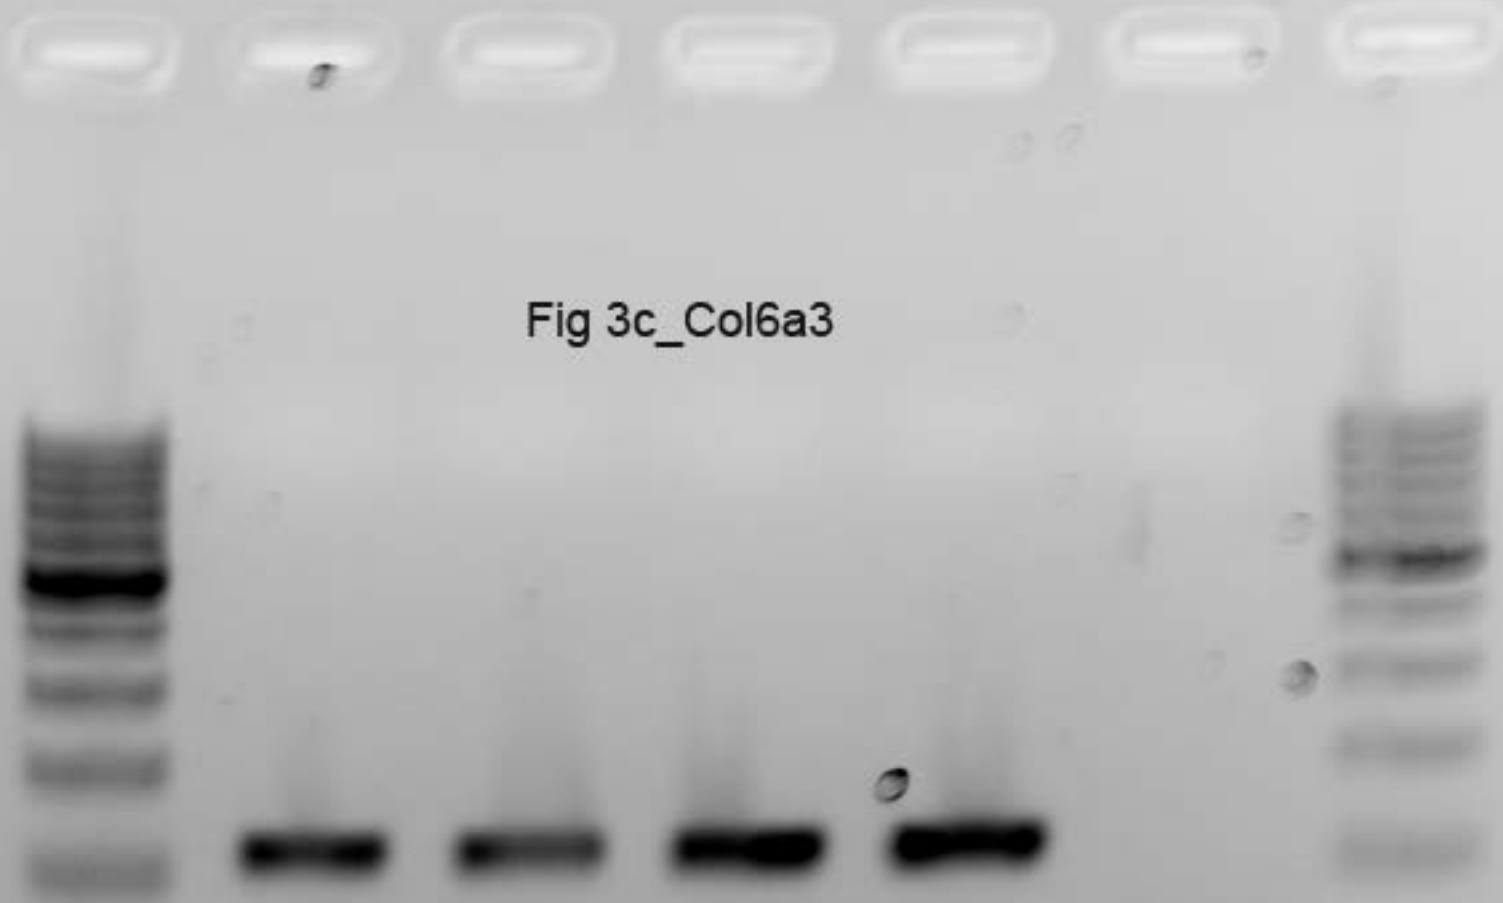

Fig 3c\_Col6a4

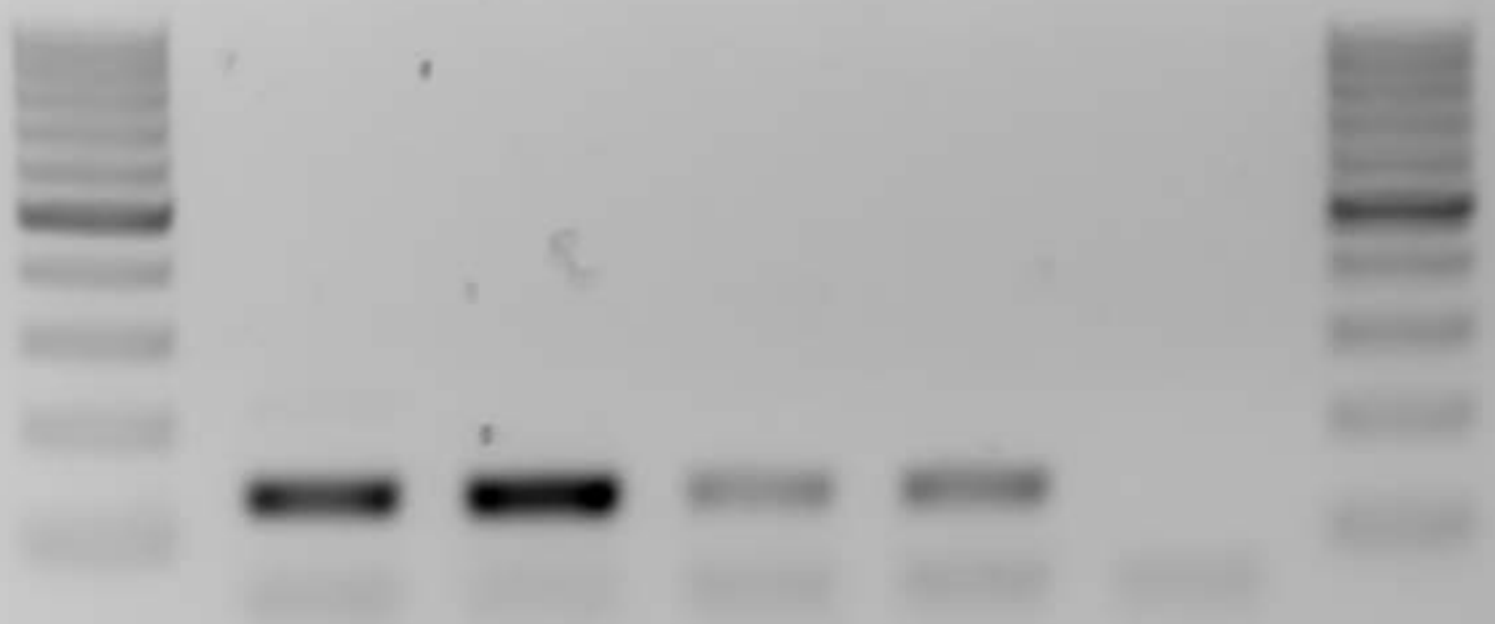

Fig 3c\_Col6a5

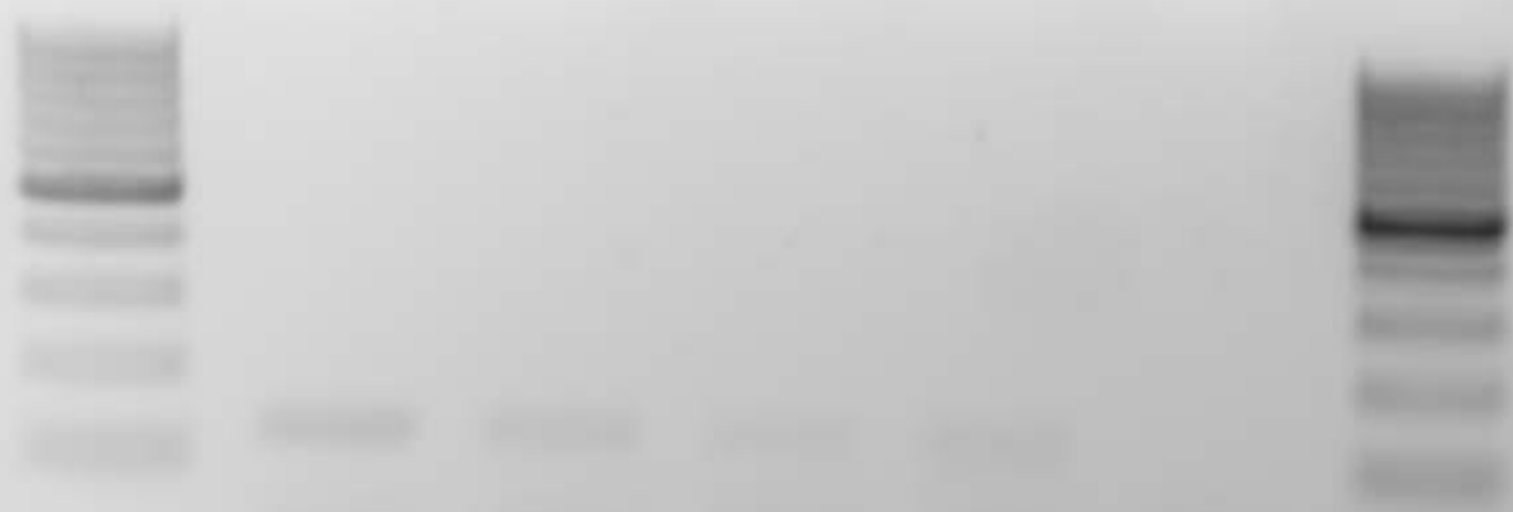

Fig 3c\_Gapdh

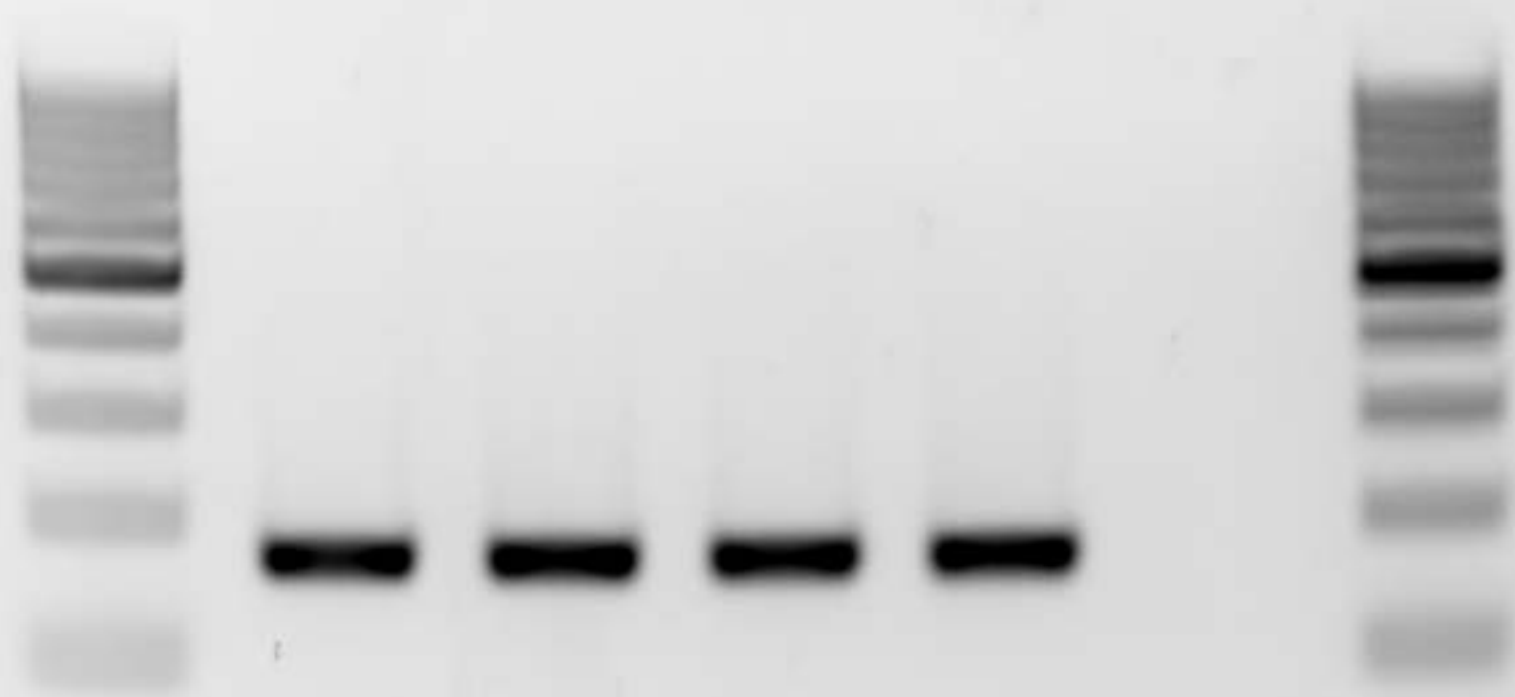

Supplement: pone.0261743.s005.pdf [file pone.0261743.s005.pdf]
